# Supplementary material for: Importance of controlling phosphate concentration in nitritation–anammox reactor operation
Source: Royal Society of Chemistry journal article supplement (doi:10.1039/c9ew00203k), 2019-01-01
Supplement: c9ew00203k1.pdf [file c9ew00203k1.pdf]

## Supplementary Information

### Importance of Controlling Phosphate Concentration in Nitrification-Anammox

#### Reactor Operation

Sen Yang<sup>1</sup>, Shengnan Xu<sup>1</sup>, Anna P. Florentino<sup>1</sup>, Abdul Mohammed<sup>2</sup>, Nicholas J. Ashbolt<sup>3</sup>  
and Yang Liu<sup>1\*</sup>

1. University of Alberta, Department of Civil and Environmental Engineering, Edmonton,  
Alberta, Canada T6G 1H9.

2. EPCOR Water Services Inc. Edmonton, Alberta, Canada.

3. University of Alberta, School of Public Health, Edmonton, Alberta, Canada T6G 2R3.

\* Corresponding author, Yang Liu, Ph.D., P.Eng.

Department of Civil and Environmental Engineering

7-263 Donadeo Innovation Centre for Engineering

University of Alberta

Edmonton, Alberta, Canada T6G 1H9

[yang.liu@ualberta.ca](mailto:yang.liu@ualberta.ca)

Table S1. Phosphate concentrations in the test of the short-term impacts.

| Conditions                                  |                                           |                                                        |                                                        |                                                         |                                                          |                                                         |
|---------------------------------------------|-------------------------------------------|--------------------------------------------------------|--------------------------------------------------------|---------------------------------------------------------|----------------------------------------------------------|---------------------------------------------------------|
| Trial1                                      | 20X dilution<br>Pre-Ostara<br>supernatant | 4X dilution<br>Pre-Ostara<br>supernatant               | 2X dilution<br>Pre-Ostara<br>supernatant               | Pre-Ostara<br>supernatant                               | Pre-Ostara<br>supernatant<br>+110mgP/L<br>of synthetic P | Pre-Ostara<br>supernatant+2<br>10mg P/L<br>synthetic P  |
| Trial 2                                     | 2X dilution<br>Post-Ostara<br>supernatant | Post-Ostara<br>supernatant+3<br>0 mgP/L<br>synthetic P | Post-Ostara<br>supernatant+9<br>0 mgP/L<br>synthetic P | Post-Ostara<br>supernatant+2<br>10 mgP/L<br>synthetic P | Post-Ostara<br>supernatant+3<br>20 mgP/L<br>synthetic P  | Post-Ostara<br>supernatant+4<br>20 mgP/L<br>synthetic P |
| Final Phosphorus<br>concentration<br>(mg/L) | 12                                        | 60                                                     | 120                                                    | 240                                                     | 350                                                      | 450                                                     |

Table S2. Primers required for q-PCR analysis and target genes.

|         | Primer      | Nucleotides sequence 5'-3' | Target                                    | References |
|---------|-------------|----------------------------|-------------------------------------------|------------|
| Anammox | AnnirS379F  | TCTATCGTTGCATCGCATTT       | AMX nirS gene                             | 1, 2       |
|         | AnnirS821R  | GGATGGGTCTTGATAAACA        |                                           |            |
| AOB     | amoA-1F     | GGGGTTTCTACTGGTGGT         | amoA gene of<br>betaproteobacteria<br>AOB | 3          |
|         | amoA-2R     | CCCCTCTGCAAAGCCTTCTTC      |                                           |            |
| NOB     | Nitro 1198f | ACCCCTAGCAAATCTCAAAAAACCG  | Nitrobacter spp.<br>16S rDNA              | 4          |
|         | Nitro 1423r | CTTCACCCCAGTCGCTGACC       |                                           |            |

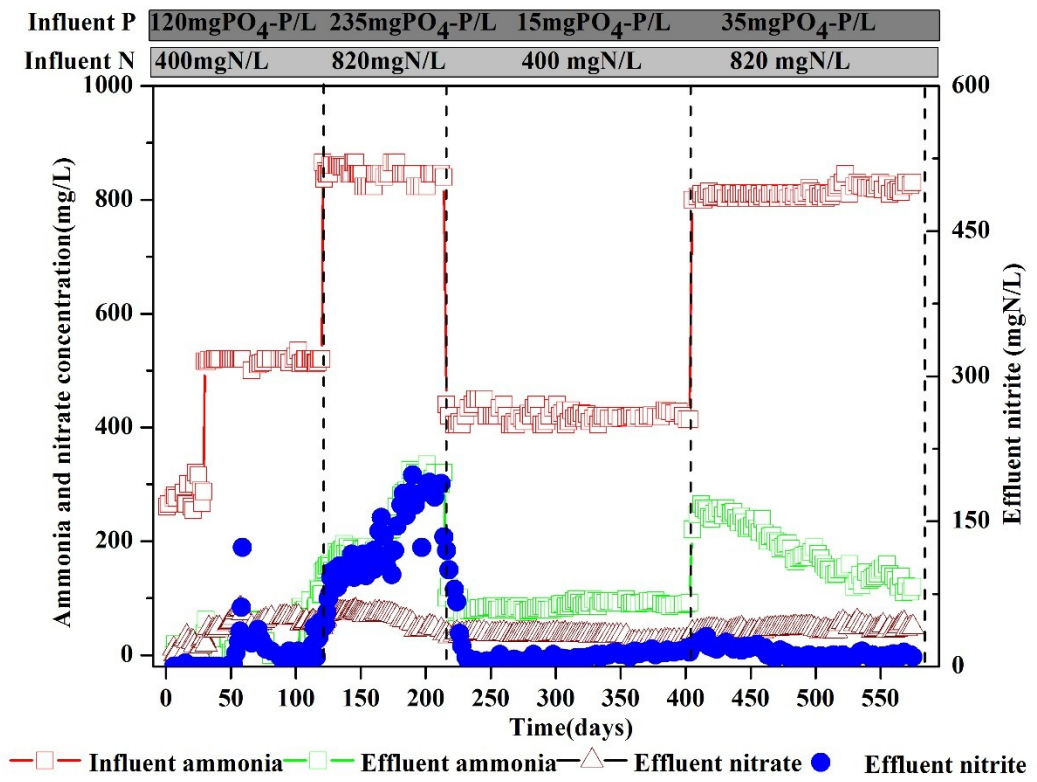

Figure S1. Influent and effluent concentrations of ammonia nitrogen, nitrite nitrogen, nitrate nitrogen during four different operational phases.

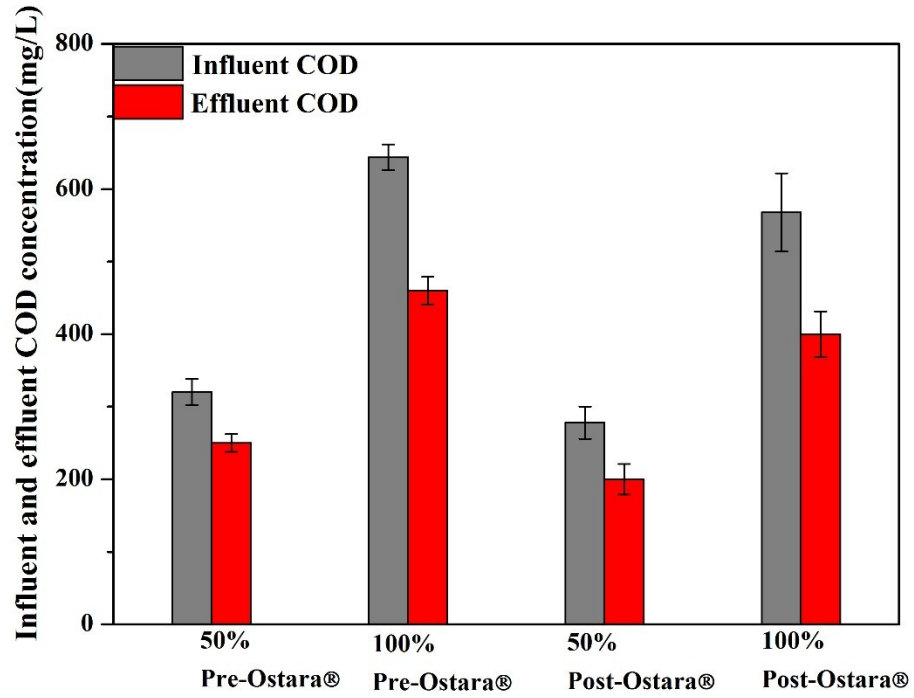

Figure S2. Average influent and effluent COD concentrations during four different operational phases.

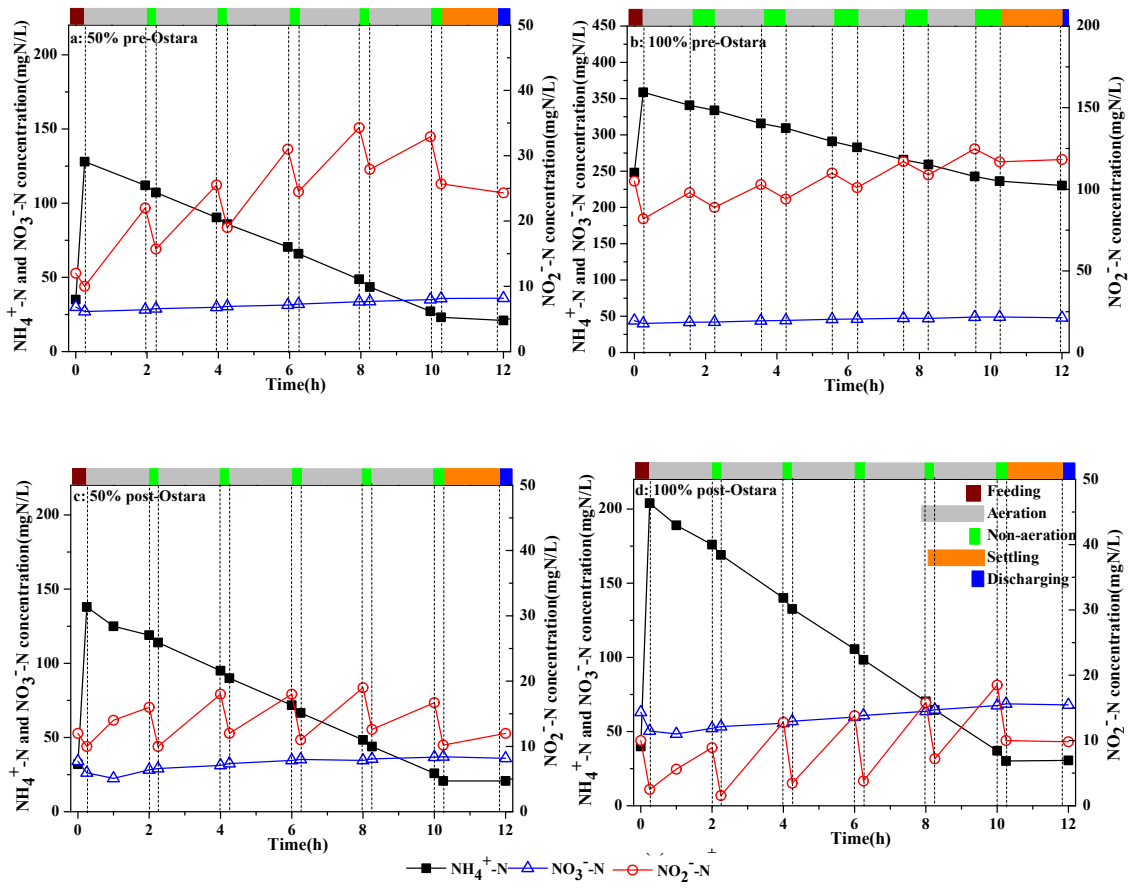

Figure S3. Inorganic nitrogen transformation concentrations in four typical SBR cycles with intermittent aeration applied during four different phases (a: 50% Pre-Ostara®; b: 100% Pre-Ostara®; c: 50% Post-Ostara® and d: 100% Post-Ostara®).

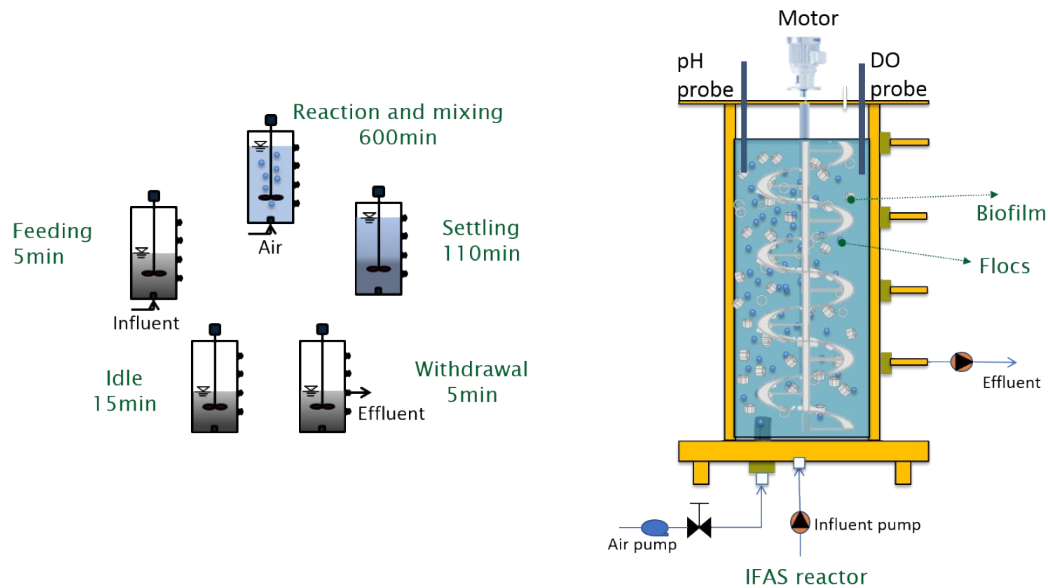

Figure S4. Schematic diagram of the IFAS reactor for one stage nitrification-anammox process

## Reference

1. M. Li, T. Ford, X. Li and J.-D. Gu, Cytochrome cd1-containing nitrite reductase encoding gene nirS as a new functional biomarker for detection of anaerobic ammonium oxidizing (Anammox) bacteria, *Environmental Science & Technology*, 2011, **45**, 3547-3553.
2. Z. Hu, D. Speth, K.-J. Francoijs, Z.-X. Quan and M. Jetten, Metagenome Analysis of a Complex Community Reveals the Metabolic Blueprint of Anammox Bacterium "Candidatus Jettenia asiatica", *Frontiers in Microbiology*, 2012, **3**.
3. N. Risgaard-Petersen, M. H. Nicolaisen, N. P. Revsbech and B. A. Lomstein, Competition between Ammonia-Oxidizing Bacteria and Benthic Microalgae, *Applied and Environmental Microbiology*, 2004, **70**, 5528-5537.

4. H.-s. Kim, A. J. Schuler, C. K. Gunsch, R. Pei, J. Gellner, J. P. Boltz, R. G. Freudenberg and R. Dodson, Comparison of Conventional and Integrated Fixed-Film Activated Sludge Systems: Attached- and Suspended-Growth Functions and Quantitative Polymerase Chain Reaction Measurements, *Water Environment Research*, 2011, **83**, 627-635.
